# Supplementary material for: The alfa and beta of tumours: a review of parameters of the linear-quadratic model, derived from clinical radiotherapy studies
Source: Springer Nature journal article supplement (doi:10.1186/s13014-018-1040-z), 2018-05-16
Supplement: MOESM1 [file 15769738]

## **Additional file 1: Appendix S1 – Search strategy**

Search strategy: Medline (PubMed)

1. dose-response relationship, radiation[MeSH Terms]
2. dose fractionation[MeSH Terms]
3. 1 OR 2
4. Linear[All Fields]
5. quadratic[All Fields]
6. 4 AND 5
7. alpha[All Fields]
8. beta[All Fields]
9. 7 AND 8
10. 6 OR 9
11. 3 AND 10
12. Linear[All Fields]
13. quadratic[All Fields]
14. 12 AND 13
15. LQ[All Fields]
16. 14 OR 15
17. alpha[All Fields]
18. beta[All Fields]
19. 16 AND 17 AND 18
20. 11 OR 19
21. humans[MeSH Terms]
22. English[LA]
23. 20 AND 21 AND 22

## Additional file 1: Figure S2 - PRISMA flow chart

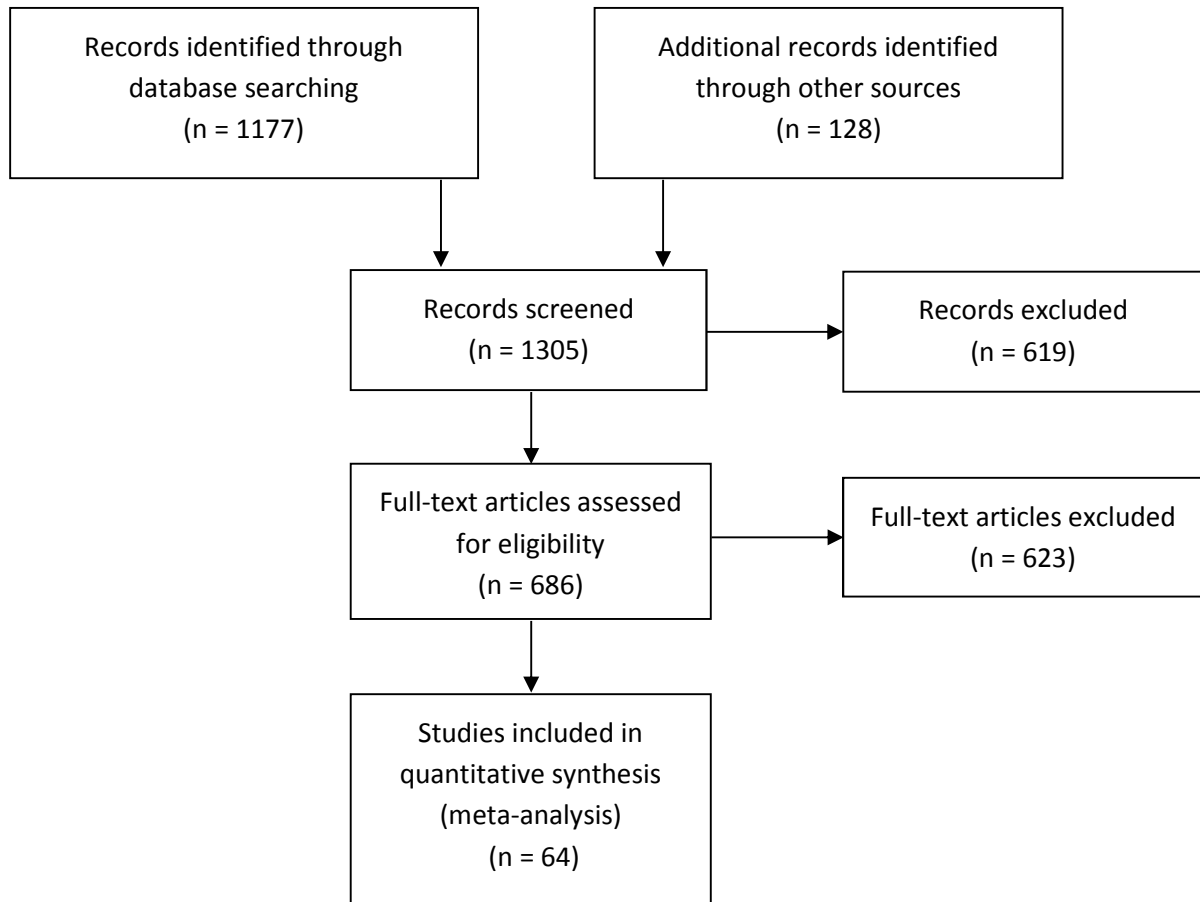

**Figure S2.** PRISMA flow chart. Because determination of radiobiological parameters is seldom the primary goal of a study, an unconventionally large number of papers passed initial title/abstract screening and could only be excluded after full-text analysis. Most common reasons for exclusion were that studies used radiobiological parameters in an analysis, but did not derive them, or that studies were based on animal or cell line data.

# Additional file 1: Figure S3 – Forest plots of $\alpha$ , $\beta$ and $\alpha/\beta$ , stratified by tumor histology

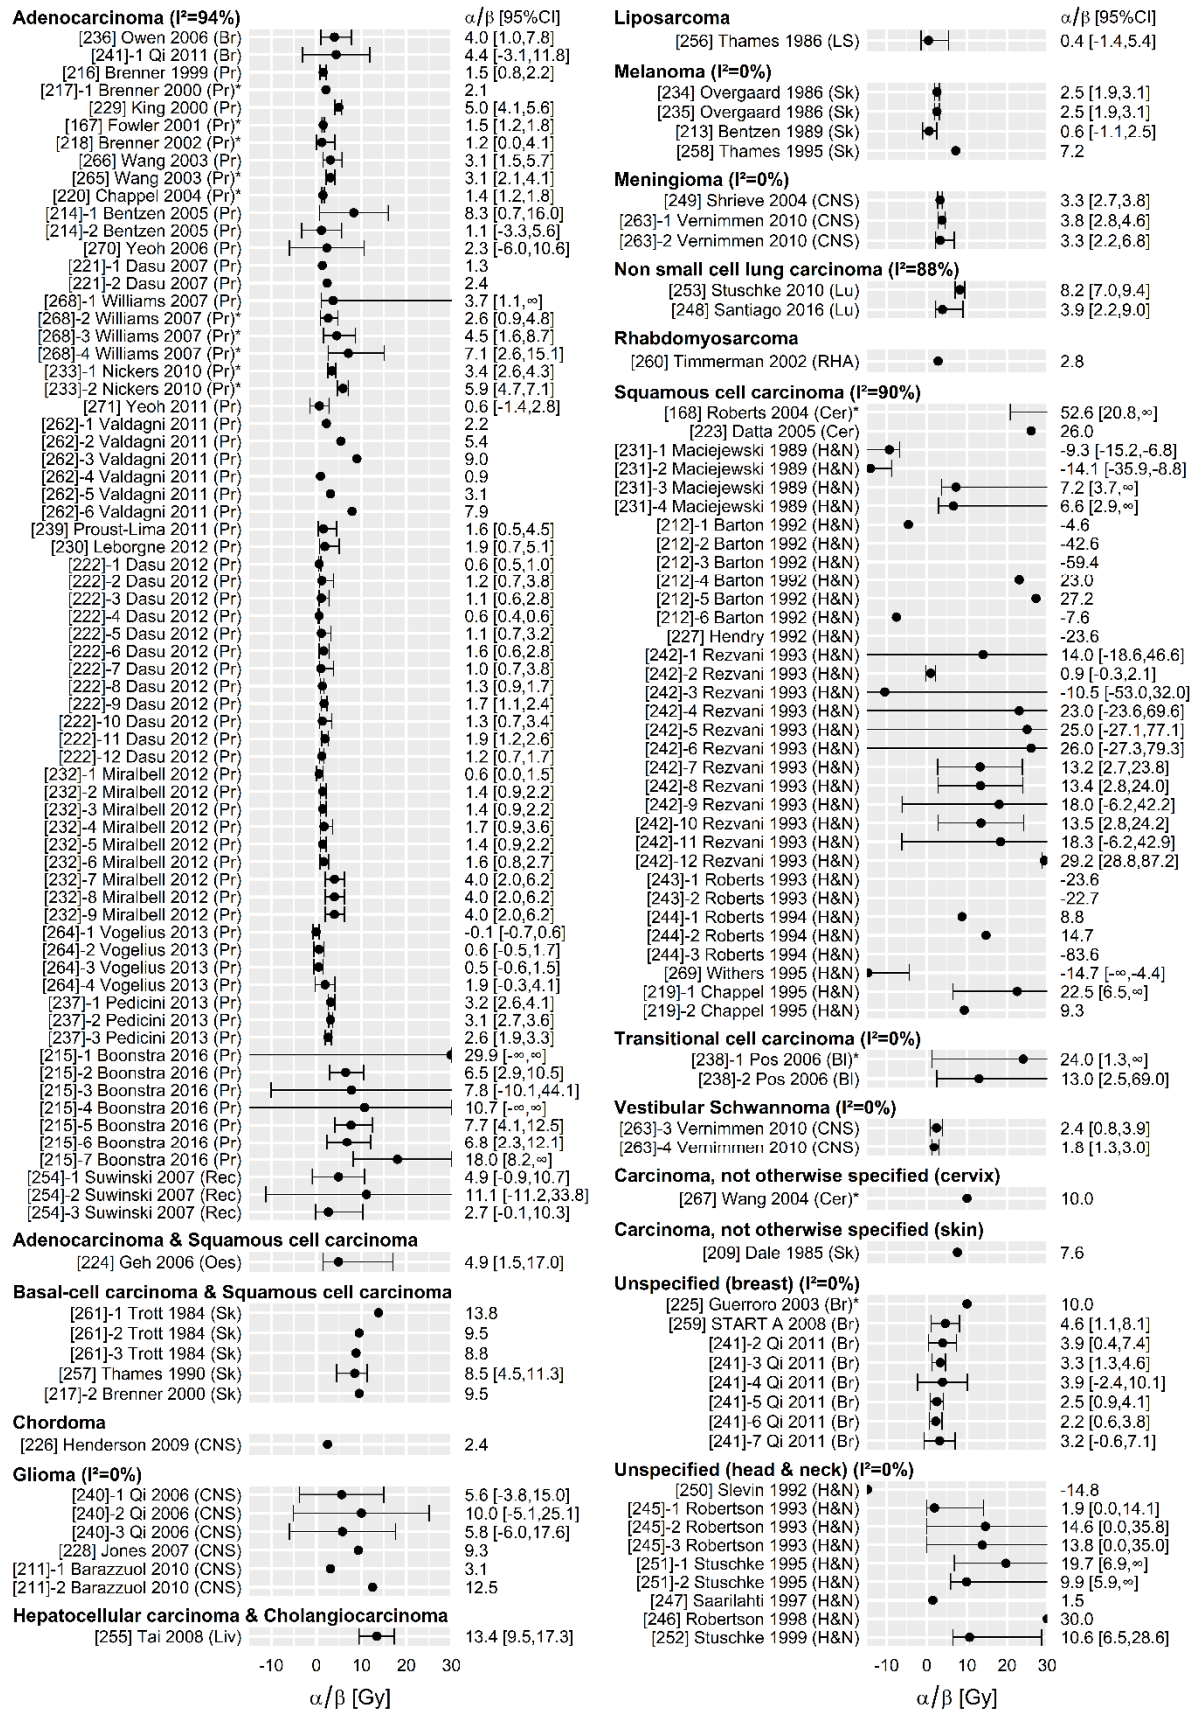

Figure S3.1. Overview of 149 reported estimates of  $\alpha/\beta$ , stratified by tumor histology. Within tumor histologies, studies are

sorted by tumor site, and then by date of publication. Br: breast; Pr: prostate; Rec: rectum; Oes: oesophagus; Sk: skin; CNS: central nervous system; Liv: liver; LS: liposarcoma; Lu: Lung; RHA: rhabdomyosarcoma; Cer: cervix; H&N: head & neck; Bl: bladder. \*Included data of patients treated with brachytherapy as part of the treatment. N.B. [68] Withers 1995 reported a 95% confidence interval consisting of two segments,  $(-\infty, -4.4)$  and  $(13.7, \infty)$ .

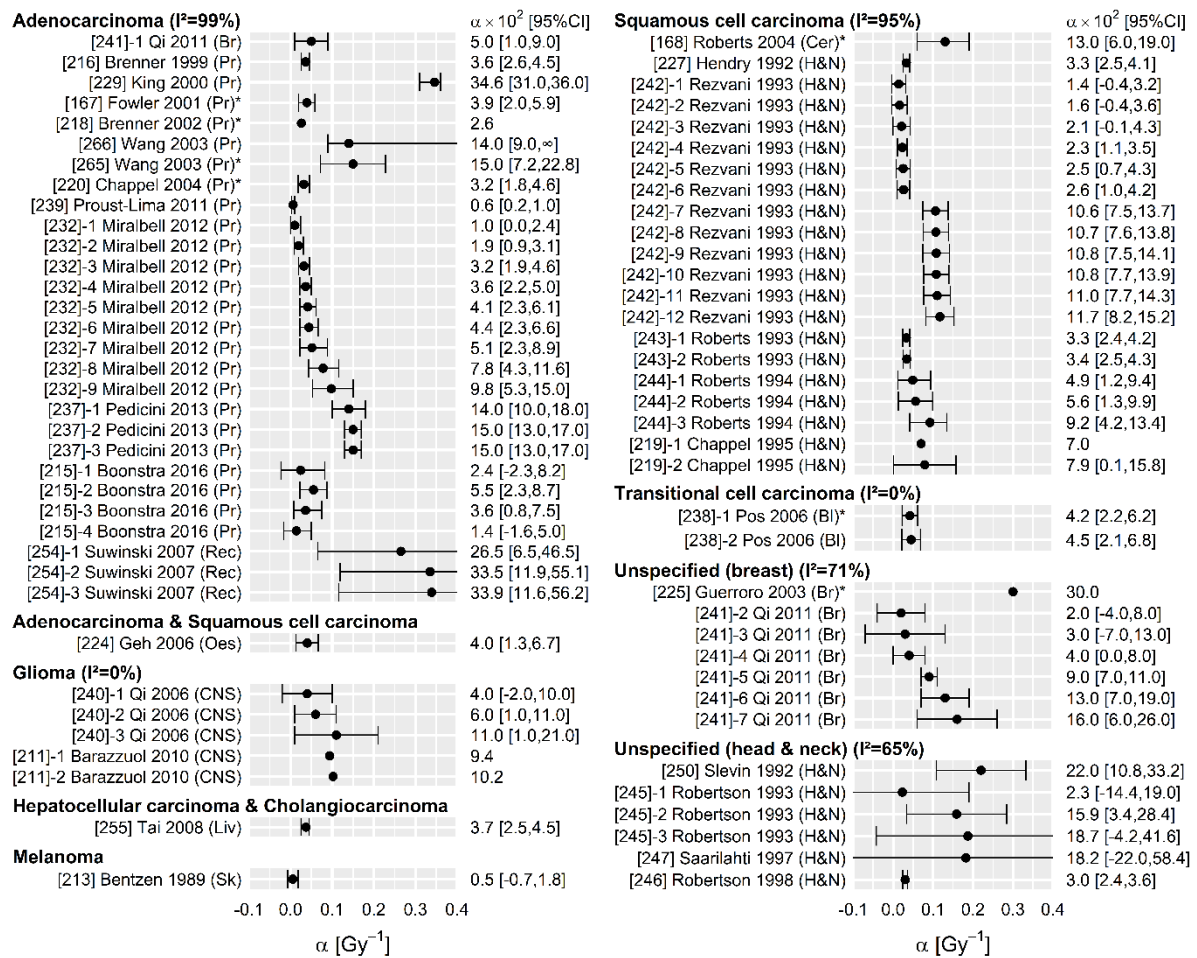

**Figure S3.2.** Overview of 72 reported estimates of  $\alpha$ , stratified by tumor histology. Within tumor histologies, studies are sorted by tumor site, and then by date of publication. Br: breast; Pr: prostate; Rec: rectum; Oes: oesophagus; CNS: central nervous system; Liv: liver; Sk: skin; Cer: cervix; H&N: head & neck; Bl: bladder. \*Included data of patients treated with brachytherapy as part of the treatment.

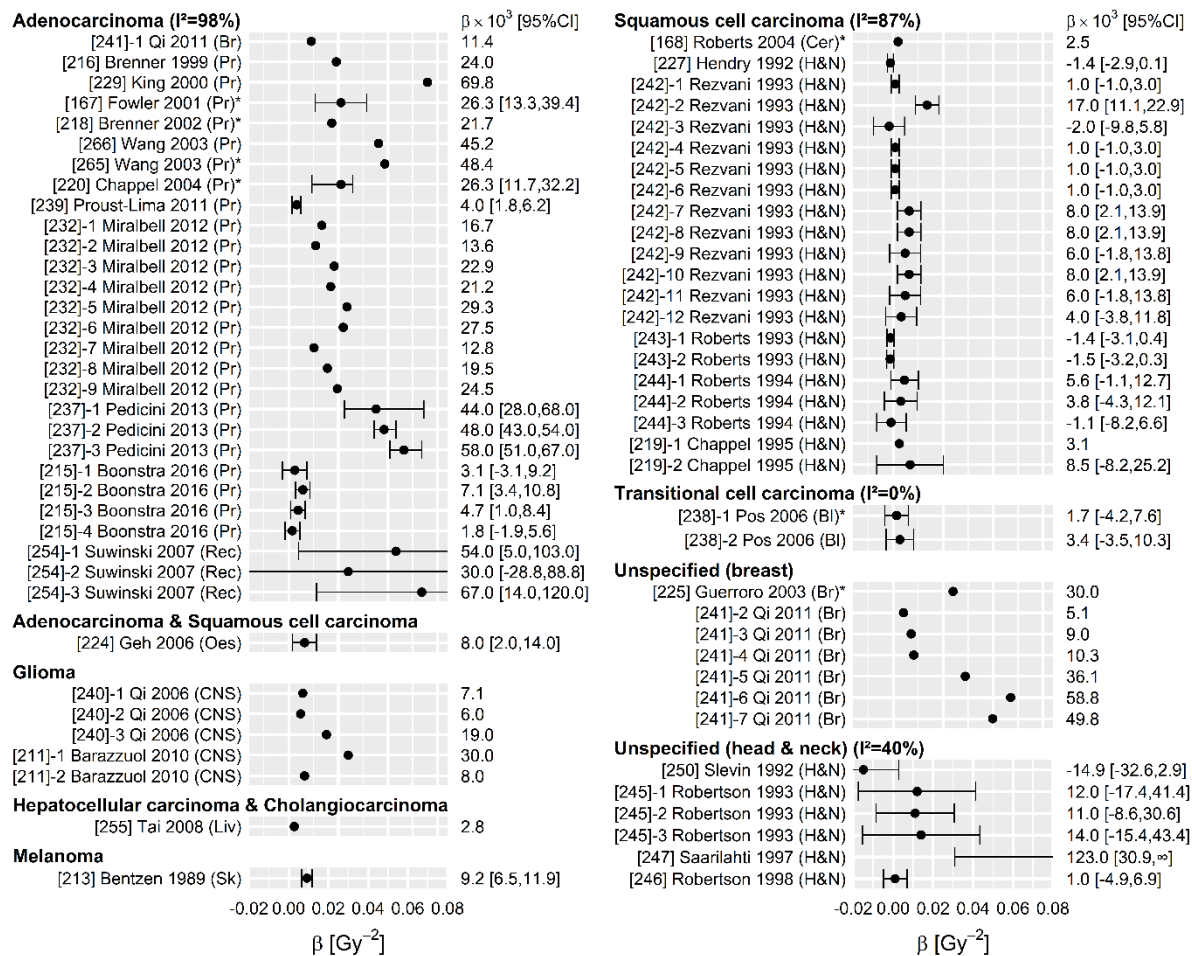

**Figure S3.3.** Overview of 72 reported estimates of  $\beta$ , stratified by tumor histology. Within tumor histologies, studies are sorted by tumor site, and then by date of publication. Br: breast; Pr: prostate; Rec: rectum; Oes: oesophagus; CNS: central nervous system; Liv: liver; Sk: skin; Cer: cervix; H&N: head & neck; Bl: bladder. \*Included data of patients treated with brachytherapy as part of the treatment.

## Additional file 1: Table S4 – Characteristics of included studies

**Table S4**

Summary of characteristics of the included studies, along with the reported values for  $\alpha$ ,  $\beta$  and  $\alpha/\beta$ . The table is sorted by site; Ties are broken by histology, then year of publication. Reference and sequence numbers correspond to those in Figures 1-3 and Figures S3.1-S3.3.

| Study                | #Patients | Stages        | Site    | Histology                   | LQ model   | TCP model | Endpoint             | $\alpha$ [ $\text{Gy}^{-1}$ ] | $\beta$ [ $\text{Gy}^{-2}$ ] | $\alpha/\beta$ [Gy] |
|----------------------|-----------|---------------|---------|-----------------------------|------------|-----------|----------------------|-------------------------------|------------------------------|---------------------|
| [36]-1 Pos 2006*     | 1302      | T1-T4         | Bladder | Transitional cell carcinoma | LQ+RP      | Logistic  | Local control        | 0.042                         | 0.0017                       | 24                  |
| [36]-2 Pos 2006      | 833       | T1-T4         | Bladder | Transitional cell carcinoma | LQ (basic) | Logistic  | Local control        | 0.045                         | 0.0034                       | 13                  |
| [34] Owen 2006       | 1410      | TisN0-T2N1    | Breast  | Adenocarcinoma              | LQ (basic) | Cox       | Local control        | X                             | X                            | 4                   |
| [39]-1 Qi 2011       | 1410      | TisN0-T2N1    | Breast  | Adenocarcinoma              | LQ+RPP     | Poisson   | Local control        | 0.05                          | 0.0114                       | 4.39                |
| [23] Guerrero 2003*  | 1005      | X             | Breast  | Unspecified                 | LQ+RP+RPP  | Poisson   | Local control        | 0.3                           | 0.03                         | 10                  |
| [58] START A 2008    | 3646      | T1N0M0-T3N1M0 | Breast  | Unspecified                 | LQ (basic) | Cox       | Locoregional control | X                             | X                            | 4.6                 |
| [39]-2 Qi 2011       | 2236      | T1N0M0-T3N1M0 | Breast  | Unspecified                 | LQ+RPP     | Poisson   | Locoregional control | 0.02                          | 0.0051                       | 3.91                |
| [39]-3 Qi 2011       | 837       | X             | Breast  | Unspecified                 | LQ+RPP     | Poisson   | Local control        | 0.03                          | 0.009                        | 3.34                |
| [39]-4 Qi 2011       | 453       | X             | Breast  | Unspecified                 | LQ+RPP     | Poisson   | Local control        | 0.04                          | 0.0103                       | 3.89                |
| [39]-5 Qi 2011       | 2215      | T1N0M0-T3N1M0 | Breast  | Unspecified                 | LQ+RPP     | Poisson   | Locoregional control | 0.09                          | 0.0361                       | 2.49                |
| [39]-6 Qi 2011       | 292       | T1N0-T2N1     | Breast  | Unspecified                 | LQ+RPP     | Poisson   | Local control        | 0.13                          | 0.0588                       | 2.21                |
| [39]-7 Qi 2011       | 1234      | I-III         | Breast  | Unspecified                 | LQ+RPP     | Poisson   | Local control        | 0.16                          | 0.0498                       | 3.21                |
| [66] Wang 2004*      | 541       | I-IV          | Cervix  | Carcinoma (NOS)             | LQ (basic) | None      | Locoregional control | X                             | X                            | 10                  |
| [43] Roberts 2004*   | 517       | I-II          | Cervix  | Squamous cell carcinoma     | LQ+RP+RPP  | Poisson   | Local control        | 0.13                          | 0.0025                       | 52.63               |
| [20] Datta 2005      | 77        | I-IV          | Cervix  | Squamous cell carcinoma     | LQ+RPP     | None      | Tumor regression     | X                             | X                            | 26                  |
| [24] Henderson 2009  | 86        | X             | CNS     | Chordoma                    | LQ (basic) | None      | Local control        | X                             | X                            | 2.45                |
| [38]-1 Qi 2006       | 243       | IV            | CNS     | Glioma                      | LQ+RP+RPP  | Poisson   | Survival             | 0.04                          | 0.0071                       | 5.6                 |
| [38]-2 Qi 2006       | 864       | X             | CNS     | Glioma                      | LQ+RP+RPP  | Poisson   | Survival             | 0.06                          | 0.006                        | 10                  |
| [38]-3 Qi 2006       | 243       | III           | CNS     | Glioma                      | LQ+RP+RPP  | Poisson   | Survival             | 0.11                          | 0.019                        | 5.8                 |
| [26] Jones 2007      | 443       | III-IV        | CNS     | Glioma                      | LQ+RPP     | None      | Regrowth delay       | X                             | X                            | 9.32                |
| [8]-1 Barazzuol 2010 | 187       | X             | CNS     | Glioma                      | LQ+RPP     | None      | Survival             | 0.094                         | 0.03                         | 3.1                 |

|                         |      |               |             |                         |            |          |               |       |         |        |
|-------------------------|------|---------------|-------------|-------------------------|------------|----------|---------------|-------|---------|--------|
| [8]-2 Barazzuol 2010    | 187  | X             | CNS         | Glioma                  | LQ+RPP     | None     | Survival      | 0.102 | 0.008   | 12.5   |
| [48] Shrieve 2004       | X    | X             | CNS         | Meningioma              | LQ (basic) | None     | Local control | X     | X       | 3.28   |
| [62]-1 Vernimmen 2010   | 1175 | X             | CNS         | Meningioma              | LQ (basic) | None     | Local control | X     | X       | 3.76   |
| [62]-2 Vernimmen 2010   | 1175 | X             | CNS         | Meningioma              | LQ (basic) | None     | Local control | X     | X       | 3.3    |
| [62]-3 Vernimmen 2010   | 1897 | X             | CNS         | Vestibular Schwannoma   | LQ (basic) | None     | Local control | X     | X       | 2.4    |
| [62]-4 Vernimmen 2010   | 1897 | X             | CNS         | Vestibular Schwannoma   | LQ (basic) | None     | Local control | X     | X       | 1.77   |
| [29]-1 Maciejewski 1989 | 175  | T1N0M0-T3N3M0 | Head & Neck | Squamous cell carcinoma | LQ+RPP     | Logistic | Local control | X     | X       | -9.35  |
| [29]-2 Maciejewski 1989 | 210  | T1N0M0-T3N3M0 | Head & Neck | Squamous cell carcinoma | LQ+RPP     | Logistic | Local control | X     | X       | -14.08 |
| [29]-3 Maciejewski 1989 | 72   | T1N0M0-T3N3M0 | Head & Neck | Squamous cell carcinoma | LQ+RPP     | Logistic | Local control | X     | X       | 7.25   |
| [29]-4 Maciejewski 1989 | 41   | T1N0M0-T3N3M0 | Head & Neck | Squamous cell carcinoma | LQ+RPP     | Logistic | Local control | X     | X       | 6.62   |
| [9]-1 Barton 1992       | 327  | T2            | Head & Neck | Squamous cell carcinoma | LQ+RPP     | Logistic | Local control | X     | X       | -4.6   |
| [9]-2 Barton 1992       | 1012 | T1-T4         | Head & Neck | Squamous cell carcinoma | LQ+RPP     | Logistic | Local control | X     | X       | -42.6  |
| [9]-3 Barton 1992       | 1012 | T1-T4         | Head & Neck | Squamous cell carcinoma | LQ+RPP     | Logistic | Local control | X     | X       | -59.4  |
| [9]-4 Barton 1992       | 208  | T1-T2         | Head & Neck | Squamous cell carcinoma | LQ+RPP     | Logistic | Local control | X     | X       | 23     |
| [9]-5 Barton 1992       | 247  | T3-T4         | Head & Neck | Squamous cell carcinoma | LQ+RPP     | Logistic | Local control | X     | X       | 27.2   |
| [9]-6 Barton 1992       | 230  | T3-T4         | Head & Neck | Squamous cell carcinoma | LQ+RPP     | Logistic | Local control | X     | X       | -7.6   |
| [25] Hendry 1992        | 4668 | T1-T4         | Head & Neck | Squamous cell carcinoma | LQ+RPP     | Poisson  | Local control | 0.033 | -0.0014 | -23.6  |
| [40]-1 Rezvani 1993     | 470  | T1            | Head & Neck | Squamous cell carcinoma | LQ+RPP     | Logistic | Local control | 0.014 | 0.001   | 14     |
| [40]-2 Rezvani 1993     | 195  | T3            | Head & Neck | Squamous cell carcinoma | LQ (basic) | Logistic | Local control | 0.016 | 0.017   | 0.94   |
| [40]-3 Rezvani 1993     | 170  | T2            | Head & Neck | Squamous cell carcinoma | LQ (basic) | Logistic | Local control | 0.021 | -0.002  | -10.5  |
| [40]-4 Rezvani 1993     | 470  | T1            | Head & Neck | Squamous cell carcinoma | LQ (basic) | Logistic | Local control | 0.023 | 0.001   | 23     |
| [40]-5 Rezvani 1993     | 470  | T1            | Head & Neck | Squamous cell carcinoma | LQ+RPP     | Logistic | Local control | 0.025 | 0.001   | 25     |
| [40]-6 Rezvani 1993     | 470  | T1            | Head & Neck | Squamous cell carcinoma | LQ+RPP     | Logistic | Local control | 0.026 | 0.001   | 26     |
| [40]-7 Rezvani 1993     | 195  | T3            | Head & Neck | Squamous cell carcinoma | LQ+RPP     | Logistic | Local control | 0.106 | 0.008   | 13.25  |
| [40]-8 Rezvani 1993     | 195  | T3            | Head & Neck | Squamous cell carcinoma | LQ+RPP     | Logistic | Local control | 0.107 | 0.008   | 13.38  |
| [40]-9 Rezvani 1993     | 170  | T2            | Head & Neck | Squamous cell carcinoma | LQ+RPP     | Logistic | Local control | 0.108 | 0.006   | 18     |

|                       |      |               |             |                                               |            |          |               |        |         |        |
|-----------------------|------|---------------|-------------|-----------------------------------------------|------------|----------|---------------|--------|---------|--------|
| [40]-10 Rezvani 1993  | 195  | T3            | Head & Neck | Squamous cell carcinoma                       | LQ+RPP     | Logistic | Local control | 0.108  | 0.008   | 13.5   |
| [40]-11 Rezvani 1993  | 170  | T2            | Head & Neck | Squamous cell carcinoma                       | LQ+RPP     | Logistic | Local control | 0.11   | 0.006   | 18.33  |
| [40]-12 Rezvani 1993  | 170  | T2            | Head & Neck | Squamous cell carcinoma                       | LQ+RPP     | Logistic | Local control | 0.117  | 0.004   | 29.25  |
| [41]-1 Roberts 1993   | 4668 | T1-T4         | Head & Neck | Squamous cell carcinoma                       | LQ+RPP     | Poisson  | Local control | 0.033  | -0.0014 | -23.6  |
| [41]-2 Roberts 1993   | 4668 | T1-T4         | Head & Neck | Squamous cell carcinoma                       | LQ+RPP     | Poisson  | Local control | 0.034  | -0.0015 | -22.7  |
| [42]-1 Roberts 1994   | 461  | T1            | Head & Neck | Squamous cell carcinoma                       | LQ+RPP     | Poisson  | Local control | 0.049  | 0.0056  | 8.75   |
| [42]-2 Roberts 1994   | 180  | T3            | Head & Neck | Squamous cell carcinoma                       | LQ+RPP     | Poisson  | Local control | 0.056  | 0.0038  | 14.74  |
| [42]-3 Roberts 1994   | 187  | T2            | Head & Neck | Squamous cell carcinoma                       | LQ+RPP     | Poisson  | Local control | 0.092  | -0.0011 | -83.64 |
| [68] Withers 1995     | 641  | T1N0-T4N3     | Head & Neck | Squamous cell carcinoma                       | LQ+RPP     | Cox      | Local control | X      | X       | -14.7  |
| [16]-1 Chappel 1995   | 766  | T1N0M0-T3N0M0 | Head & Neck | Squamous cell carcinoma                       | LQ+RPP     | Logistic | Local control | 0.07   | 0.0031  | 22.5   |
| [16]-2 Chappel 1995   | 145  | T1N0M0-T4N0M0 | Head & Neck | Squamous cell carcinoma                       | LQ+RPP     | Logistic | Local control | 0.0793 | 0.0085  | 9.33   |
| [49] Slevin 1992      | 496  | T2-T3         | Head & Neck | Unspecified                                   | LQ+RPP     | Poisson  | Local control | 0.22   | -0.0149 | -14.8  |
| [44]-1 Robertson 1993 | 24   | T3N0M0-T4N0M0 | Head & Neck | Unspecified                                   | LQ+RPP     | Poisson  | Local control | 0.023  | 0.012   | 1.9    |
| [44]-2 Robertson 1993 | 48   | T2N0M0        | Head & Neck | Unspecified                                   | LQ+RPP     | Poisson  | Local control | 0.159  | 0.011   | 14.6   |
| [44]-3 Robertson 1993 | 95   | T1N0M0        | Head & Neck | Unspecified                                   | LQ+RPP     | Poisson  | Local control | 0.187  | 0.014   | 13.8   |
| [50]-1 Stuschke 1995  | 321  | T2N0M0-T3N1M0 | Head & Neck | Unspecified                                   | LQ (basic) | None     | TCD50         | X      | X       | 19.7   |
| [50]-2 Stuschke 1995  | 321  | T2N0M0-T3N1M0 | Head & Neck | Unspecified                                   | LQ (basic) | None     | TCD50         | X      | X       | 9.9    |
| [46] Saarlahti 1998   | 117  | T1            | Head & Neck | Unspecified                                   | LQ+RPP     | Logistic | Local control | 0.182  | 0.123   | 1.48   |
| [45] Robertson 1998   | 395  | T1N0-T4N1     | Head & Neck | Unspecified                                   | LQ+RPP     | Cox      | Local control | 0.03   | 0.001   | 30     |
| [51] Stuschke 1999    | 1489 | T1N0-T4N3     | Head & Neck | Unspecified                                   | LQ (basic) | None     | TCD50         | X      | X       | 10.64  |
| [55] Thames 1986      | 58   | X             | Liposarcoma | Liposarcoma                                   | LQ (basic) | None     | Local control | X      | X       | 0.4    |
| [54] Tai 2008         | 321  | T3-T4         | Liver       | Hepatocellular carcinoma & Cholangiocarcinoma | LQ+RPP     | Poisson  | Survival      | 0.037  | 0.0028  | 13.4   |
| [52] Stuschke 2010    | 2038 | I-III         | Lung        | Non small cell lung carcinoma                 | LQ (basic) | Logistic | Local control | X      | X       | 8.2    |
| [47] Santiago 2016    | 2319 | T1-T2         | Lung        | Non small cell lung carcinoma                 | LQ (basic) | Logistic | Local control | X      | X       | 3.9    |



|                       |      |               |            |                                          |                    |          |                                |        |        |      |
|-----------------------|------|---------------|------------|------------------------------------------|--------------------|----------|--------------------------------|--------|--------|------|
| [22] Geh 2006         | 1284 | X             | Oesophagus | Adenocarcinoma & Squamous cell carcinoma | LQ+RPP             | Logistic | Pathological complete response | 0.04   | 0.008  | 4.9  |
| [13] Brenner 1999     | 367  | T1N0-T3N1     | Prostate   | Adenocarcinoma                           | LQ (basic)         | Poisson  | bNED                           | 0.036  | 0.024  | 1.5  |
| [14]-1 Brenner 2000*  | 367  | T1N0-T3N1     | Prostate   | Adenocarcinoma                           | LQ + heterogeneity | Poisson  | bNED                           | X      | X      | 2.1  |
| [27] King 2000        | 367  | T1N0-T3N1     | Prostate   | Adenocarcinoma                           | LQ + heterogeneity | Poisson  | bNED                           | 0.346  | 0.0698 | 4.96 |
| [21] Fowler 2001*     | 1450 | T2            | Prostate   | Adenocarcinoma                           | LQ+RP              | Poisson  | bNED                           | 0.0391 | 0.0263 | 1.49 |
| [15] Brenner 2002*    | 192  | T1-T3         | Prostate   | Adenocarcinoma                           | LQ (basic)         | Poisson  | bNED                           | 0.026  | 0.0217 | 1.2  |
| [65] Wang 2003        | 142  | T1-T3         | Prostate   | Adenocarcinoma                           | LQ+RP+RPP          | Poisson  | bNED                           | 0.14   | 0.0452 | 3.1  |
| [64] Wang 2003*       | 1552 | X             | Prostate   | Adenocarcinoma                           | LQ+RP+RPP          | Poisson  | bNED                           | 0.15   | 0.0484 | 3.1  |
| [17] Chappel 2004*    | 1450 | T2            | Prostate   | Adenocarcinoma                           | LQ+RP              | Poisson  | bNED                           | 0.0317 | 0.0263 | 1.44 |
| [11]-1 Bentzen 2005   | 330  | X             | Prostate   | Adenocarcinoma                           | LQ (basic)         | None     | bNED                           | X      | X      | 8.3  |
| [11]-2 Bentzen 2005   | 936  | T1-T2         | Prostate   | Adenocarcinoma                           | LQ (basic)         | None     | bNED                           | X      | X      | 1.12 |
| [69] Yeoh 2006        | 217  | T1N0M0-T2N0M0 | Prostate   | Adenocarcinoma                           | LQ (basic)         | None     | bNED                           | X      | X      | 2.3  |
| [18]-1 Dasu 2007      | 705  | T1N0M0-T4N0M0 | Prostate   | Adenocarcinoma                           | LQ (basic)         | None     | bNED                           | X      | X      | 1.3  |
| [18]-2 Dasu 2007      | 282  | T1N0M0-T4N0M0 | Prostate   | Adenocarcinoma                           | LQ (basic)         | None     | bNED                           | X      | X      | 2.4  |
| [67]-1 Williams 2007  | 3571 | T1-T4         | Prostate   | Adenocarcinoma                           | LQ (basic)         | Cox      | bNED                           | X      | X      | 3.7  |
| [67]-2 Williams 2007* | 3756 | T1-T4         | Prostate   | Adenocarcinoma                           | LQ (basic)         | Cox      | bNED                           | X      | X      | 2.6  |
| [67]-3 Williams 2007* | 3756 | T1-T4         | Prostate   | Adenocarcinoma                           | LQ (basic)         | Cox      | bNED                           | X      | X      | 4.5  |
| [67]-4 Williams 2007* | 3756 | T1-T4         | Prostate   | Adenocarcinoma                           | LQ (basic)         | Cox      | bNED                           | X      | X      | 7.1  |
| [31]-1 Nickers 2010*  | 328  | T1-T3         | Prostate   | Adenocarcinoma                           | LQ+RP              | None     | bNED                           | X      | X      | 3.41 |
| [31]-2 Nickers 2010*  | 328  | T1-T3         | Prostate   | Adenocarcinoma                           | LQ+RP              | None     | bNED                           | X      | X      | 5.87 |
| [70] Yeoh 2011        | 96   | T1N0M0-T2N0M0 | Prostate   | Adenocarcinoma                           | LQ (basic)         | None     | bNED                           | X      | X      | 0.65 |
| [61]-1 Valdagni 2011  | 84   | T1-T4         | Prostate   | Adenocarcinoma                           | LQ (basic)         | None     | bNED                           | X      | X      | 2.2  |
| [61]-2 Valdagni 2011  | 148  | T1-T4         | Prostate   | Adenocarcinoma                           | LQ (basic)         | None     | bNED                           | X      | X      | 5.4  |
| [61]-3 Valdagni 2011  | 84   | T1-T4         | Prostate   | Adenocarcinoma                           | LQ (basic)         | None     | bNED                           | X      | X      | 9    |

|                       |      |       |          |                |            |          |                   |        |        |       |
|-----------------------|------|-------|----------|----------------|------------|----------|-------------------|--------|--------|-------|
| [61]-4 Valdagni 2011  | 84   | T1-T4 | Prostate | Adenocarcinoma | LQ (basic) | None     | bNED              | X      | X      | 0.9   |
| [61]-5 Valdagni 2011  | 148  | T1-T4 | Prostate | Adenocarcinoma | LQ (basic) | None     | bNED              | X      | X      | 3.1   |
| [61]-6 Valdagni 2011  | 84   | T1-T4 | Prostate | Adenocarcinoma | LQ (basic) | None     | bNED              | X      | X      | 7.9   |
| [37] Proust-Lima 2011 | 5093 | T1-T4 | Prostate | Adenocarcinoma | LQ (basic) | Other    | Slope of PSA rise | 0.0062 | 0.004  | 1.55  |
| [28] Leborgne 2012    | 274  | X     | Prostate | Adenocarcinoma | LQ (basic) | None     | bNED              | X      | X      | 1.86  |
| [19]-1 Dasu 2012      | 803  | X     | Prostate | Adenocarcinoma | LQ (basic) | Logistic | bNED              | X      | X      | 0.6   |
| [19]-2 Dasu 2012      | 996  | X     | Prostate | Adenocarcinoma | LQ (basic) | Logistic | bNED              | X      | X      | 1.2   |
| [19]-3 Dasu 2012      | 1024 | X     | Prostate | Adenocarcinoma | LQ (basic) | Logistic | bNED              | X      | X      | 1.1   |
| [19]-4 Dasu 2012      | 803  | X     | Prostate | Adenocarcinoma | LQ+RPP     | Logistic | bNED              | X      | X      | 0.6   |
| [19]-5 Dasu 2012      | 996  | X     | Prostate | Adenocarcinoma | LQ+RPP     | Logistic | bNED              | X      | X      | 1.1   |
| [19]-6 Dasu 2012      | 1024 | X     | Prostate | Adenocarcinoma | LQ+RPP     | Logistic | bNED              | X      | X      | 1.6   |
| [19]-7 Dasu 2012      | 1315 | X     | Prostate | Adenocarcinoma | LQ (basic) | Logistic | bNED              | X      | X      | 1     |
| [19]-8 Dasu 2012      | 2631 | X     | Prostate | Adenocarcinoma | LQ (basic) | Logistic | bNED              | X      | X      | 1.3   |
| [19]-9 Dasu 2012      | 2561 | X     | Prostate | Adenocarcinoma | LQ (basic) | Logistic | bNED              | X      | X      | 1.7   |
| [19]-10 Dasu 2012     | 1315 | X     | Prostate | Adenocarcinoma | LQ+RPP     | Logistic | bNED              | X      | X      | 1.3   |
| [19]-11 Dasu 2012     | 2631 | X     | Prostate | Adenocarcinoma | LQ+RPP     | Logistic | bNED              | X      | X      | 1.9   |
| [19]-12 Dasu 2012     | 2561 | X     | Prostate | Adenocarcinoma | LQ+RPP     | Logistic | bNED              | X      | X      | 1.2   |
| [30]-1 Miralbell 2012 | 1405 | X     | Prostate | Adenocarcinoma | LQ (basic) | Poisson  | bNED              | 0.01   | 0.0167 | 0.6   |
| [30]-2 Miralbell 2012 | 1405 | X     | Prostate | Adenocarcinoma | LQ (basic) | Poisson  | bNED              | 0.019  | 0.0136 | 1.4   |
| [30]-3 Miralbell 2012 | 2616 | X     | Prostate | Adenocarcinoma | LQ (basic) | Poisson  | bNED              | 0.032  | 0.0229 | 1.4   |
| [30]-4 Miralbell 2012 | 2616 | X     | Prostate | Adenocarcinoma | LQ (basic) | Poisson  | bNED              | 0.036  | 0.0212 | 1.7   |
| [30]-5 Miralbell 2012 | 1948 | X     | Prostate | Adenocarcinoma | LQ (basic) | Poisson  | bNED              | 0.041  | 0.0293 | 1.4   |
| [30]-6 Miralbell 2012 | 1948 | X     | Prostate | Adenocarcinoma | LQ (basic) | Poisson  | bNED              | 0.044  | 0.0275 | 1.6   |
| [30]-7 Miralbell 2012 | 1405 | X     | Prostate | Adenocarcinoma | LQ+RPP     | Poisson  | bNED              | 0.051  | 0.0128 | 4     |
| [30]-8 Miralbell 2012 | 2616 | X     | Prostate | Adenocarcinoma | LQ+RPP     | Poisson  | bNED              | 0.078  | 0.0195 | 4     |
| [30]-9 Miralbell 2012 | 1948 | X     | Prostate | Adenocarcinoma | LQ+RPP     | Poisson  | bNED              | 0.098  | 0.0245 | 4     |
| [63]-1 Vogelius 2013  | 1965 | X     | Prostate | Adenocarcinoma | LQ (basic) | None     | bNED              | X      | X      | -0.07 |
| [63]-2 Vogelius 2013  | 1965 | X     | Prostate | Adenocarcinoma | LQ+RPP     | None     | bNED              | X      | X      | 0.58  |
| [63]-3 Vogelius 2013  | 1797 | X     | Prostate | Adenocarcinoma | LQ (basic) | None     | bNED              | X      | X      | 0.47  |

|                      |      |               |                   |                                                |            |         |                                               |       |        |      |
|----------------------|------|---------------|-------------------|------------------------------------------------|------------|---------|-----------------------------------------------|-------|--------|------|
| [63]-4 Vogelius 2013 | 1797 | X             | Prostate          | Adenocarcinoma                                 | LQ+RPP     | None    | bNED                                          | X     | X      | 1.93 |
| [35]-1 Pedicini 2013 | X    | X             | Prostate          | Adenocarcinoma                                 | LQ+RPP     | Poisson | bNED                                          | 0.14  | 0.044  | 3.18 |
| [35]-2 Pedicini 2013 | X    | X             | Prostate          | Adenocarcinoma                                 | LQ+RPP     | Poisson | bNED                                          | 0.15  | 0.048  | 3.12 |
| [35]-3 Pedicini 2013 | X    | X             | Prostate          | Adenocarcinoma                                 | LQ+RPP     | Poisson | bNED                                          | 0.15  | 0.058  | 2.59 |
| [12]-1 Boonstra 2016 | 289  | T1N0M0-T2N0M0 | Prostate          | Adenocarcinoma                                 | LQ (basic) | Other   | PSA                                           | 0.024 | 0.0031 | 29.9 |
| [12]-2 Boonstra 2016 | 289  | T1N0M0-T2N0M0 | Prostate          | Adenocarcinoma                                 | LQ (basic) | Other   | PSA                                           | 0.055 | 0.0071 | 6.5  |
| [12]-3 Boonstra 2016 | 289  | T1N0M0-T2N0M0 | Prostate          | Adenocarcinoma                                 | LQ (basic) | Other   | PSA                                           | 0.036 | 0.0047 | 7.8  |
| [12]-4 Boonstra 2016 | 289  | T1N0M0-T2N0M0 | Prostate          | Adenocarcinoma                                 | LQ (basic) | Other   | PSA                                           | 0.014 | 0.0018 | 10.7 |
| [12]-5 Boonstra 2016 | 289  | T1N0M0-T2N0M0 | Prostate          | Adenocarcinoma                                 | LQ (basic) | Other   | PSA                                           | X     | X      | 7.7  |
| [12]-6 Boonstra 2016 | 289  | T1N0M0-T2N0M0 | Prostate          | Adenocarcinoma                                 | LQ+RPP     | Other   | PSA                                           | X     | X      | 6.8  |
| [12]-7 Boonstra 2016 | 289  | T1N0M0-T2N0M0 | Prostate          | Adenocarcinoma                                 | LQ (basic) | Cox     | bNED                                          | X     | X      | 18   |
| [53]-1 Suwinski 2007 | 168  | T1N0M0-T4N1M0 | Rectum            | Adenocarcinoma                                 | LQ (basic) | Cox     | Locoregional control                          | 0.265 | 0.054  | 4.9  |
| [53]-2 Suwinski 2007 | 168  | T1N0M0-T4N1M0 | Rectum            | Adenocarcinoma                                 | LQ+RPP     | Poisson | Locoregional control                          | 0.335 | 0.03   | 11.1 |
| [53]-3 Suwinski 2007 | 168  | T1N0M0-T4N1M0 | Rectum            | Adenocarcinoma                                 | LQ (basic) | Poisson | Locoregional control                          | 0.339 | 0.067  | 2.66 |
| [59] Timmerman 2002  | 490  | X             | Rhabdo-myosarcoma | Rhabdomyosarcoma                               | LQ (basic) | None    | Relapse free survival / disease free survival | X     | X      | 2.8  |
| [60]-1 Trott 1984    | 909  | X             | Skin              | Basal-cell carcinoma & Squamous cell carcinoma | LQ (basic) | None    | TCD90                                         | X     | X      | 13.8 |
| [60]-2 Trott 1984    | 909  | X             | Skin              | Basal-cell carcinoma & Squamous cell carcinoma | LQ (basic) | None    | TCD50                                         | X     | X      | 9.5  |
| [60]-3 Trott 1984    | 909  | X             | Skin              | Basal-cell carcinoma & Squamous cell carcinoma | LQ (basic) | None    | TCD37                                         | X     | X      | 8.8  |
| [56] Thames 1990     | 784  | X             | Skin              | Basal-cell carcinoma & Squamous cell carcinoma | LQ (basic) | None    | Local control                                 | X     | X      | 8.5  |

|                     |     |   |      |                                                |                    |         |                   |        |        |      |
|---------------------|-----|---|------|------------------------------------------------|--------------------|---------|-------------------|--------|--------|------|
| [14]-2 Brenner 2000 | 784 | X | Skin | Basal-cell carcinoma & Squamous cell carcinoma | LQ + heterogeneity | Poisson | Local control     | X      | X      | 9.5  |
| [5] Dale 1985       | X   | X | Skin | Carcinoma (NOS)                                | LQ+RP              | None    | Unspecified       | X      | X      | 7.6  |
| [32] Overgaard 1986 | 114 | X | Skin | Melanoma                                       | LQ (basic)         | None    | TCD50             | X      | X      | 2.5  |
| [33] Overgaard 1986 | 618 | X | Skin | Melanoma                                       | LQ (basic)         | None    | TCD50             | X      | X      | 2.5  |
| [10] Bentzen 1989   | 239 | X | Skin | Melanoma                                       | LQ (basic)         | Poisson | Local control     | 0.0053 | 0.0092 | 0.57 |
| [57] Thames 1995    | 126 | X | Skin | Melanoma                                       | LQ (basic)         | None    | Complete response | X      | X      | 7.2  |

\*Included data of patients treated with brachytherapy as part of the treatment.

Nomenclature

***Histologies***

NOS: not otherwise specified

***LQ model***

RP: repair

RPP: repopulation

N.B. Occasionally the same study and patient group appears multiple times in the table with, other than different outcomes, no apparent difference. This occurs when authors repeatedly analyzed the same data using slightly different analysis methods, but those differences were not reflected in the variables selected for extraction. E.g. Barton (1992) performed two similar analyses on his cohort of 1012 patients, the only difference was that in the second analysis ([9]-3) additional factors were included to correct for stage and (sub)site.

## Additional file 1: Table S5 – Common LQ models and TCP models

### LQ models

**Table S5.1**

Types of LQ models and their formulae.

| LQ models                                | Formula                                                                                                                                                                                                     |
|------------------------------------------|-------------------------------------------------------------------------------------------------------------------------------------------------------------------------------------------------------------|
| Basic                                    | $SF = Exp[-\alpha \cdot D - \beta \cdot d \cdot D]$                                                                                                                                                         |
| Basic + repopulation                     | $SF = Exp[-\alpha \cdot D - \beta \cdot d \cdot D + Ln[2] \frac{T - T_k}{T_{pot}}]$                                                                                                                         |
| Basic + incomplete repair                | $SF = Exp[-\alpha \cdot D_T - \beta \cdot d \cdot D - \frac{2 \cdot \beta \cdot R^2}{\mu} \left\{ T_{pr} - \frac{1 - \exp[-\mu \cdot T_{pr}]}{\mu} \right\}]$                                               |
| Basic + incomplete repair + repopulation | $SF = Exp \left[ -\alpha \cdot D_T - \beta \cdot d \cdot D - \frac{2 \cdot \beta \cdot R^2}{\mu} \left\{ T_{pr} - \frac{1 - \exp[-\mu \cdot T_{pr}]}{\mu} \right\} + Ln[2] \frac{T - T_k}{T_{pot}} \right]$ |
| Basic + heterogeneity                    | $SF_i = \exp[-\alpha_i \cdot D - \beta_i \cdot d \cdot D]$                                                                                                                                                  |

#### Nomenclature

SF: the fraction of surviving cells

$\alpha$ ,  $\beta$ : radiosensitivity parameters

D: total unprotracted dose

$D_T$ : total dose including protracted dose

d: the fraction dose

T: the overall treatment time

$T_k$ : the delay of accelerated repopulation

$T_{pot}$ : the potential doubling time

$T_{pr}$ : the total time over which the protracted dose is delivered

R: the dose rate for the protracted irradiation

$\mu$ : the repair constant for potentially lethal damage repair.

The formulae provided here (Table S5.1) are examples, though several ways of expressing the same terms exist. Expressions in the included papers are therefore not necessarily the same as provided here.

In the LQ model incorporating (intratumor) heterogeneity, the radiosensitivity parameters  $\alpha_i$  and  $\beta_i$  represents the radiosensitivity in subvolume i of the tumor, and  $SF_i$  represents the survival fraction in that subvolume. The parameters  $\alpha_i$  and  $\beta_i$  are commonly assumed to follow a normal or log-normal distribution.

### TCP models

If two different fractionation schemes prove to be equivalent, these can be used to estimate  $\alpha/\beta$ . However, to estimate separate  $\alpha$  and  $\beta$  values, the surviving fraction predicted by the LQ model needs to be linked to a clinical outcome using explicit models, which are shown in Table S5.2.

**Table S5.2**

TCP models and their formulae.

| TCP models               | Formula                                                                |
|--------------------------|------------------------------------------------------------------------|
| No explicit model        | None (uses two equivalent treatment schemes to derive $\alpha/\beta$ ) |
| Poisson TCP              | $TCP = Exp[-N_0 \cdot SF]$                                             |
| Logistic TCP             | $TCP = \frac{1}{1 + N_0 \cdot SF}$                                     |
| Cox proportional hazards | $\lambda(t) = \lambda_0(t) \cdot N_0 \cdot SF$                         |

|       |                                                                            |
|-------|----------------------------------------------------------------------------|
| Other | Some custom formula was used to relate the LQ model to a clinical outcome. |
|-------|----------------------------------------------------------------------------|

The expression used for the surviving fraction depends on which type of LQ model was used.

Instead of  $N_0$  (which for the Poisson model is generally interpreted as the number of clonogenic cells at the start of treatment), a parametrization  $k = \ln[N_0]$  is often used so that the constant  $k$  can be included in the linear-quadratic part of the survival formula. E.g. for a combination of a Poisson TCP model and basic LQ model, the TCP model is often written as  $TCP = \text{Exp}[-\text{Exp}[k - \alpha \cdot D - \beta \cdot d \cdot D]]$  rather than  $TCP = \text{Exp}[-N_0 \cdot \text{Exp}[-\alpha \cdot D - \beta \cdot d \cdot D]]$ . Mathematically, these expressions are identical.

In the Cox proportional hazards model,  $\lambda(t)$  represents the hazard function and  $\lambda_0(t)$  is the baseline hazard function.

## Additional file 1: Table S6 – Heterogeneity with/without studies including brachytherapy

**Table S6.1**

Heterogeneity in  $\alpha/\beta$ ,  $\alpha$  and  $\beta$  estimates when grouped by site.  $I^2$  values excluding those studies that included data from patients treated with brachytherapy are also shown ( $I^2$ , no BT). A dash indicates that there were insufficient studies (i.e. less than two) for calculating  $I^2$  for that combination of outcome ( $\alpha/\beta$ ,  $\alpha$  and  $\beta$ ) and tumor site.

| Tumour site | $\alpha/\beta$ |                   | $\alpha$  |                   | $\beta$   |                   |
|-------------|----------------|-------------------|-----------|-------------------|-----------|-------------------|
|             | $I^2$ (%)      | $I^2$ , no BT (%) | $I^2$ (%) | $I^2$ , no BT (%) | $I^2$ (%) | $I^2$ , no BT (%) |
| Bladder     | 0              | -                 | 0         | -                 | 0         | -                 |
| Breast      | 0              | 0                 | 66        | 66                | -         | -                 |
| CNS         | 60             | 60                | 0         | -                 | -         | -                 |
| Head & Neck | 87             | 87                | 95        | 95                | 84        | 84                |
| Lung        | 88             | 88                | -         | -                 | -         | -                 |
| Prostate    | 94             | 92                | 99        | 99                | 99        | 99                |
| Rectum      | 0              | 0                 | 0         | 0                 | 0         | 0                 |
| Skin        | 97             | 97                | -         | -                 | -         | -                 |

**Table S6.2**

Heterogeneity in  $\alpha/\beta$ ,  $\alpha$  and  $\beta$  estimates when grouped by histology.  $I^2$  values excluding those studies that included data from patients treated with brachytherapy are also shown ( $I^2$ , no BT). A dash indicates that there were insufficient studies (i.e. less than two) for calculating  $I^2$  for that combination of outcome ( $\alpha/\beta$ ,  $\alpha$  and  $\beta$ ) and tumor histology.

| Tumour histology              | $\alpha/\beta$ |                   | $\alpha$  |                   | $\beta$   |                   |
|-------------------------------|----------------|-------------------|-----------|-------------------|-----------|-------------------|
|                               | $I^2$ (%)      | $I^2$ , no BT (%) | $I^2$ (%) | $I^2$ , no BT (%) | $I^2$ (%) | $I^2$ , no BT (%) |
| Adenocarcinoma                | 94             | 91                | 99        | 99                | 98        | 99                |
| Glioma                        | 0              | 0                 | 0         | 0                 | -         | -                 |
| Melanoma                      | 0              | 0                 | -         | -                 | -         | -                 |
| Meningioma                    | 0              | 0                 | -         | -                 | -         | -                 |
| Non small cell lung carcinoma | 88             | 88                | -         | -                 | -         | -                 |
| Squamous cell carcinoma       | 90             | 90                | 95        | 95                | 87        | 87                |
| Transitional cell carcinoma   | 0              | -                 | 0         | -                 | 0         | -                 |
| Unspecified (breast)          | 0              | 0                 | 71        | 71                | -         | -                 |
| Unspecified (head & neck)     | 0              | 0                 | 65        | 65                | 40        | 40                |
| Vestibular Schwannoma         | 0              | 0                 | -         | -                 | -         | -                 |
